# Supplementary material for: Psychosocial and Behavioral Impact of COVID-19 in Autism Spectrum Disorder: An Online Parent Survey
Source: Brain Sci. 2020 Jun 3;10(6):341. doi: 10.3390/brainsci10060341 (PMC7349059; doi:10.3390/brainsci10060341)
Supplement: Supplementary file 1 [file brainsci-10-00341-s001.pdf]

**Supplementary Table S1.** Responses to the open-response question about what medical comorbidity was present in children with ASD.

|                                           | N  | %    |
|-------------------------------------------|----|------|
| Neuromotor conditions                     | 55 | 28.5 |
| Gastrointestinal conditions               | 48 | 24.9 |
| Allergies and food sensitivity            | 45 | 23.3 |
| Other neuropsychiatric conditions         | 15 | 7.8  |
| Rare genetic conditions                   | 9  | 4.7  |
| Endocrinological and metabolic conditions | 8  | 4.1  |
| Cardiological conditions                  | 6  | 3.1  |
| Cutaneous conditions                      | 4  | 2.1  |
| Urinary conditions                        | 3  | 1.6  |

Out of 152 respondents, 117 parents reported one medical comorbidity (77%), 31 parents reported two medical comorbidities (20.4%), 2 parents reported three medical comorbidities (1.3%), and 2 parents reported four medical comorbidities (1.3%), for a total of 193 responses.
